# Supplementary material for: Levulinic acid production from Cicer arietinum, cotton, Pinus radiata and sugarcane bagasse
Source: Royal Society of Chemistry journal article supplement (doi:10.1039/c4ra06246a), 2014-01-01
Supplement: c4ra06246a1.pdf [file c4ra06246a1.pdf]

Electronic Supplementary Information (ESI)

Levulinic acid production from *Cicer arietinum*, Cotton, *Pinus radiata*  
and Sugar cane bagasse

Amudhavalli Victor<sup>a</sup>, Indra Neel Pulidindi<sup>a</sup>, Aharon Gedanken<sup>a, b\*</sup>

<sup>a</sup>Department of Chemistry, Bar-Ilan University, Ramat-Gan 52900, Israel and

<sup>b</sup>National Cheng Kung University, Department of Materials Science and Engineering,  
Tainan 70101, Taiwan

Tel: +972-3-5318315; Fax: +972-3-7384053;

\*E-mail: [gedanken@mail.biu.ac.il](mailto:gedanken@mail.biu.ac.il)

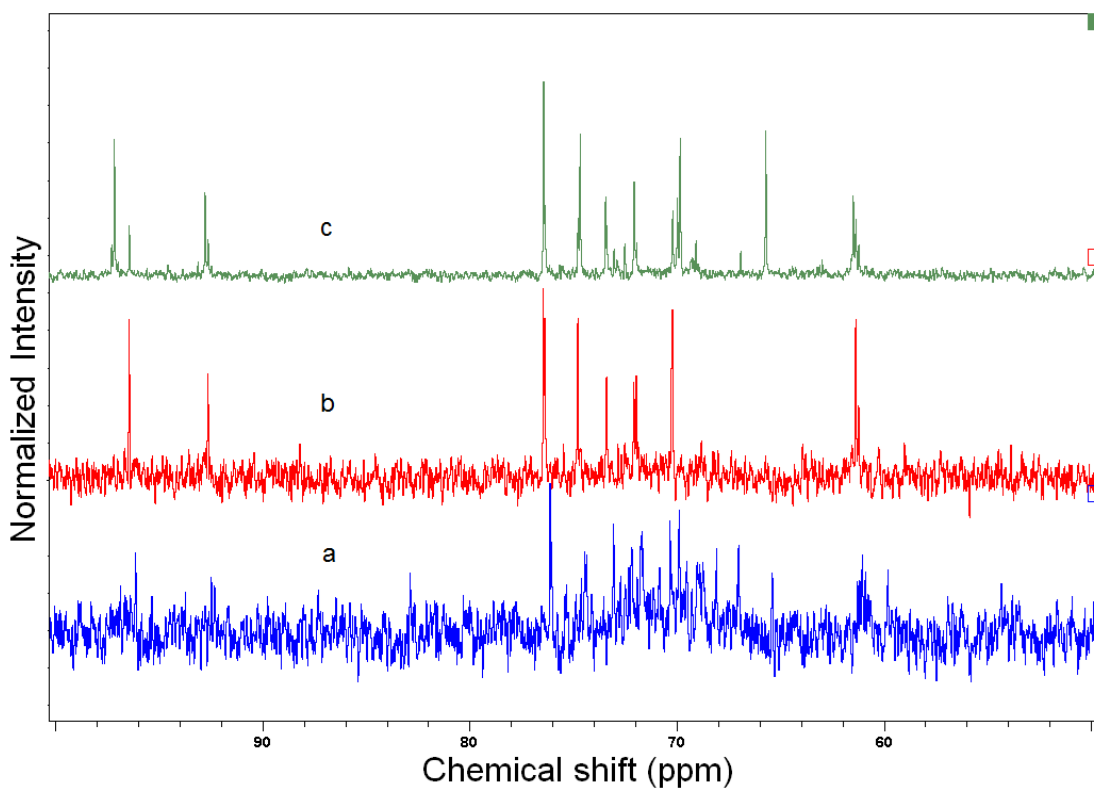

**Fig. S1.** <sup>13</sup>C NMR spectra of the hydrolyzate from (a) *cicer arietinum* (b) cotton and (c) sugar cane bagasse at 393 K with 1 M HCl for 1 h.

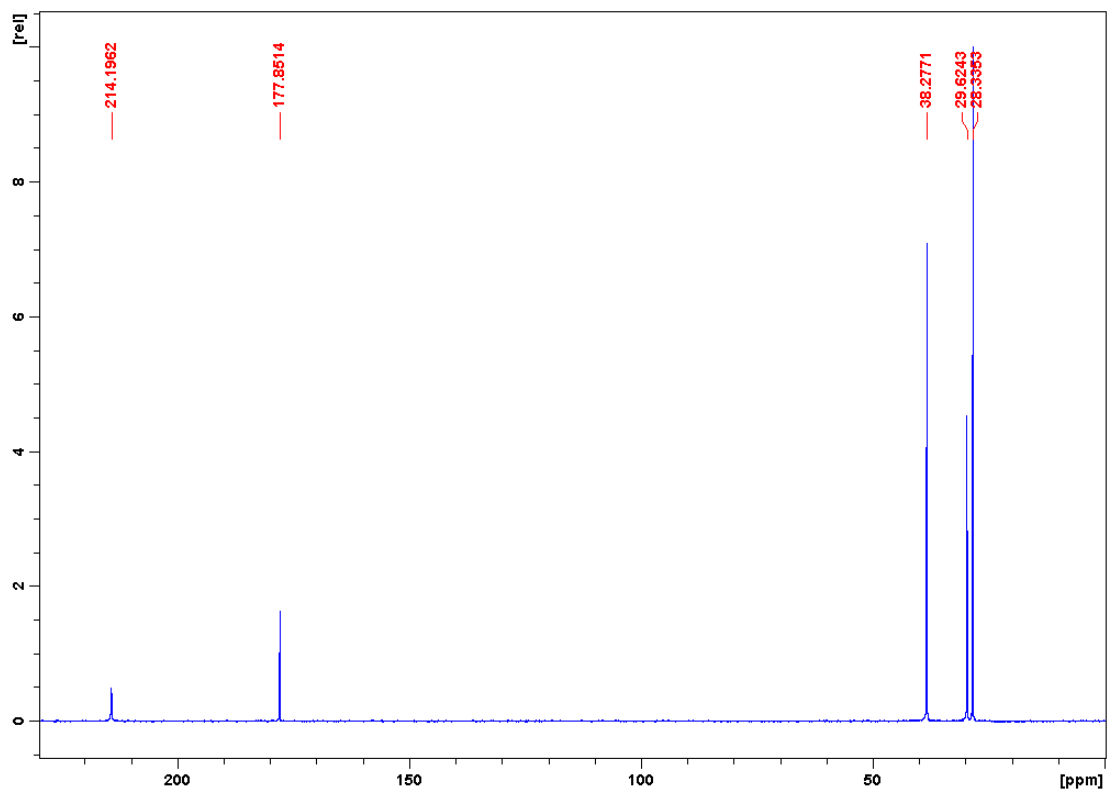

**Fig. S2.**  $^{13}\text{C}$  NMR spectrum of levulinic acid (authentic sample)

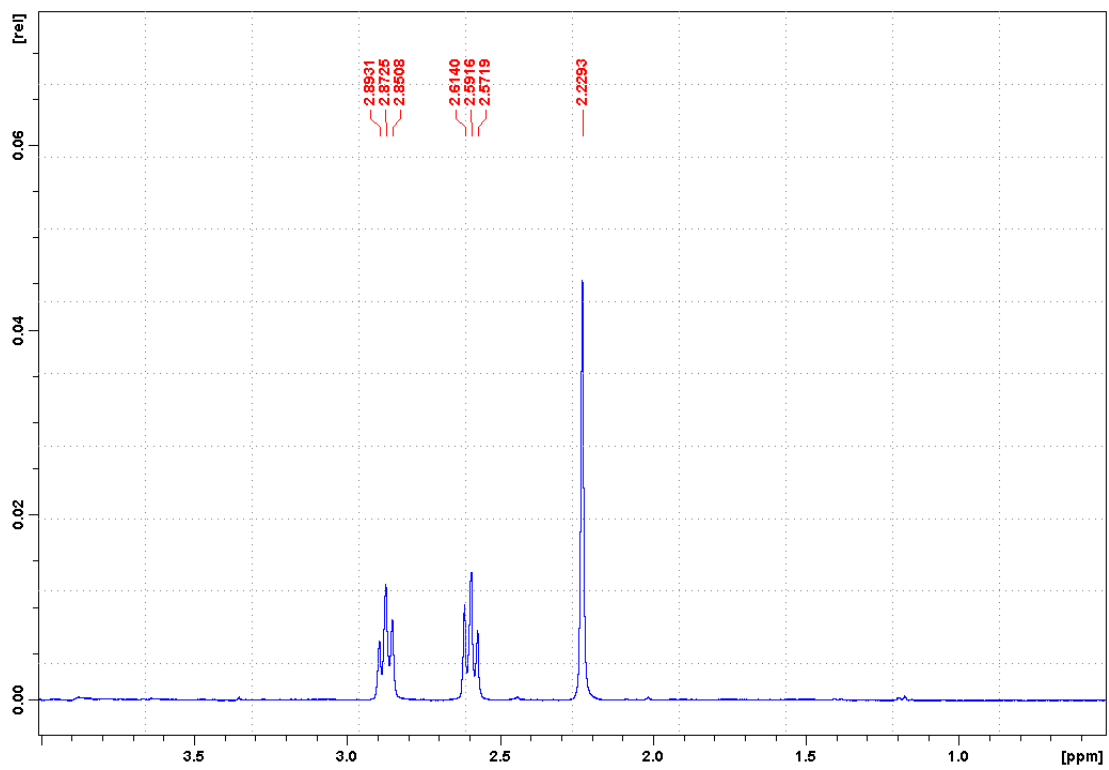

**Fig. S3.** <sup>1</sup>H NMR spectrum of levulinic acid (authentic sample)
